# Supplementary material for: The role of proximity in problem identification: risk of water scarcity in Texas
Source: Oxford University Press journal article supplement (doi:10.2166/wp.2016.021), 2016-08-23
Supplement: wp2016021supp.docx [file wp2016021supp.docx]

APPENDIX A

| Appendix Figure 1: Map of Texas Zip Codes and their Center Point |
| --- |
| 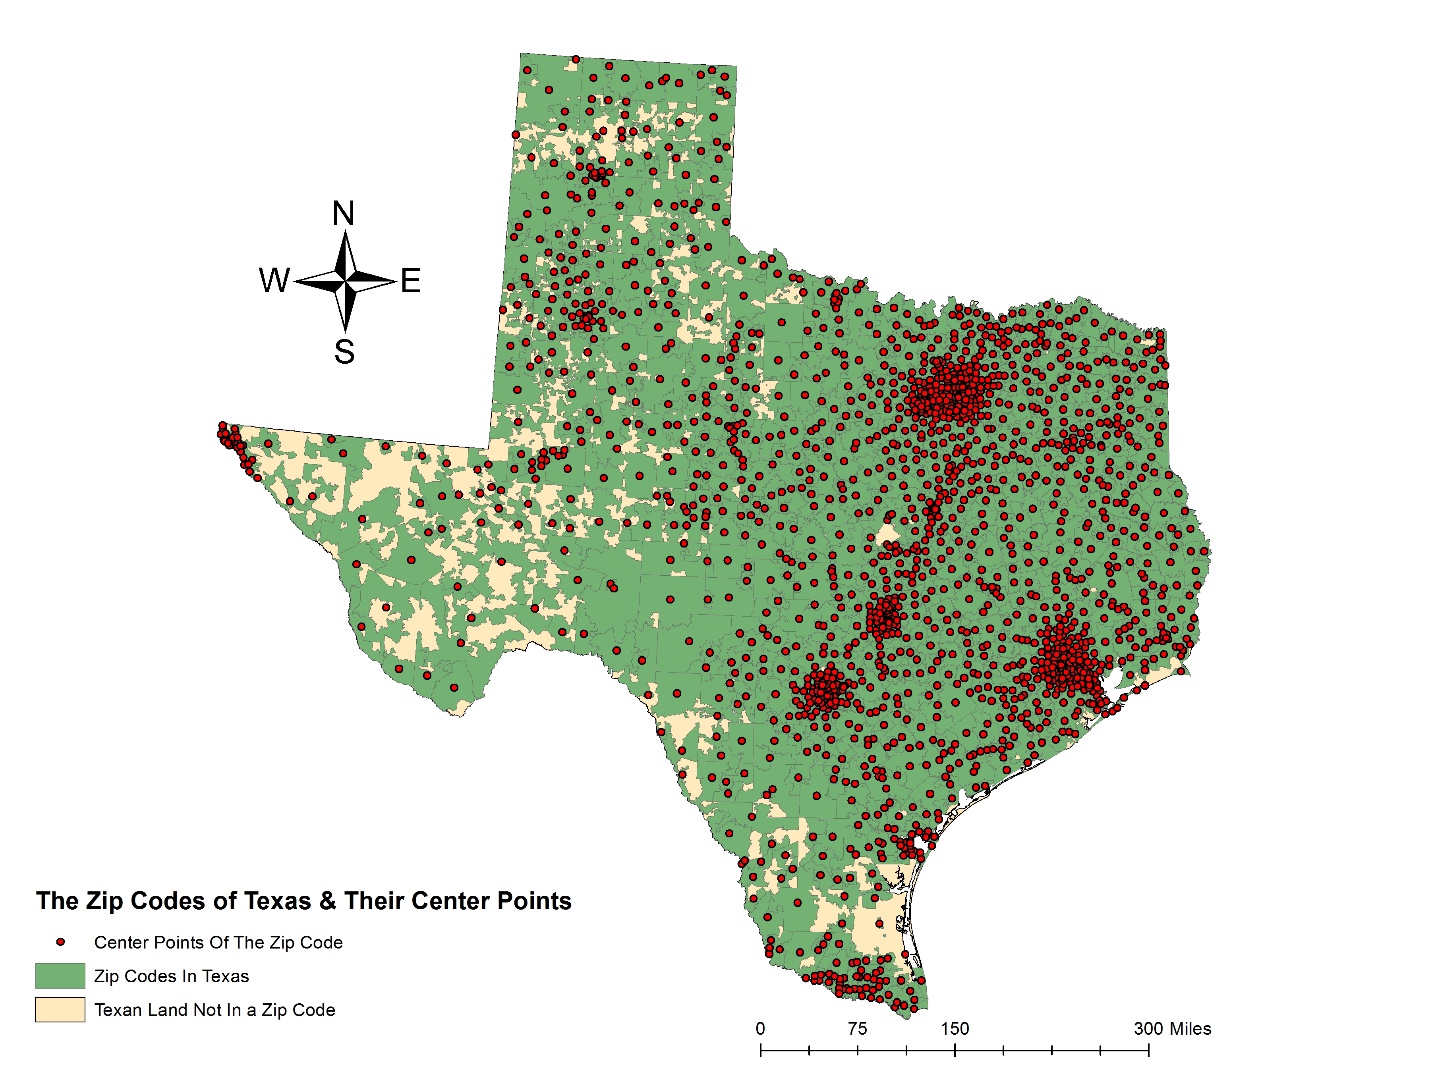 |
| Source: United States Census Bureau Tiger/Line Files |

| Appendix Figure 2: Map of Texas Zip Code Population Density, by Population Quantiles |
| --- |
| 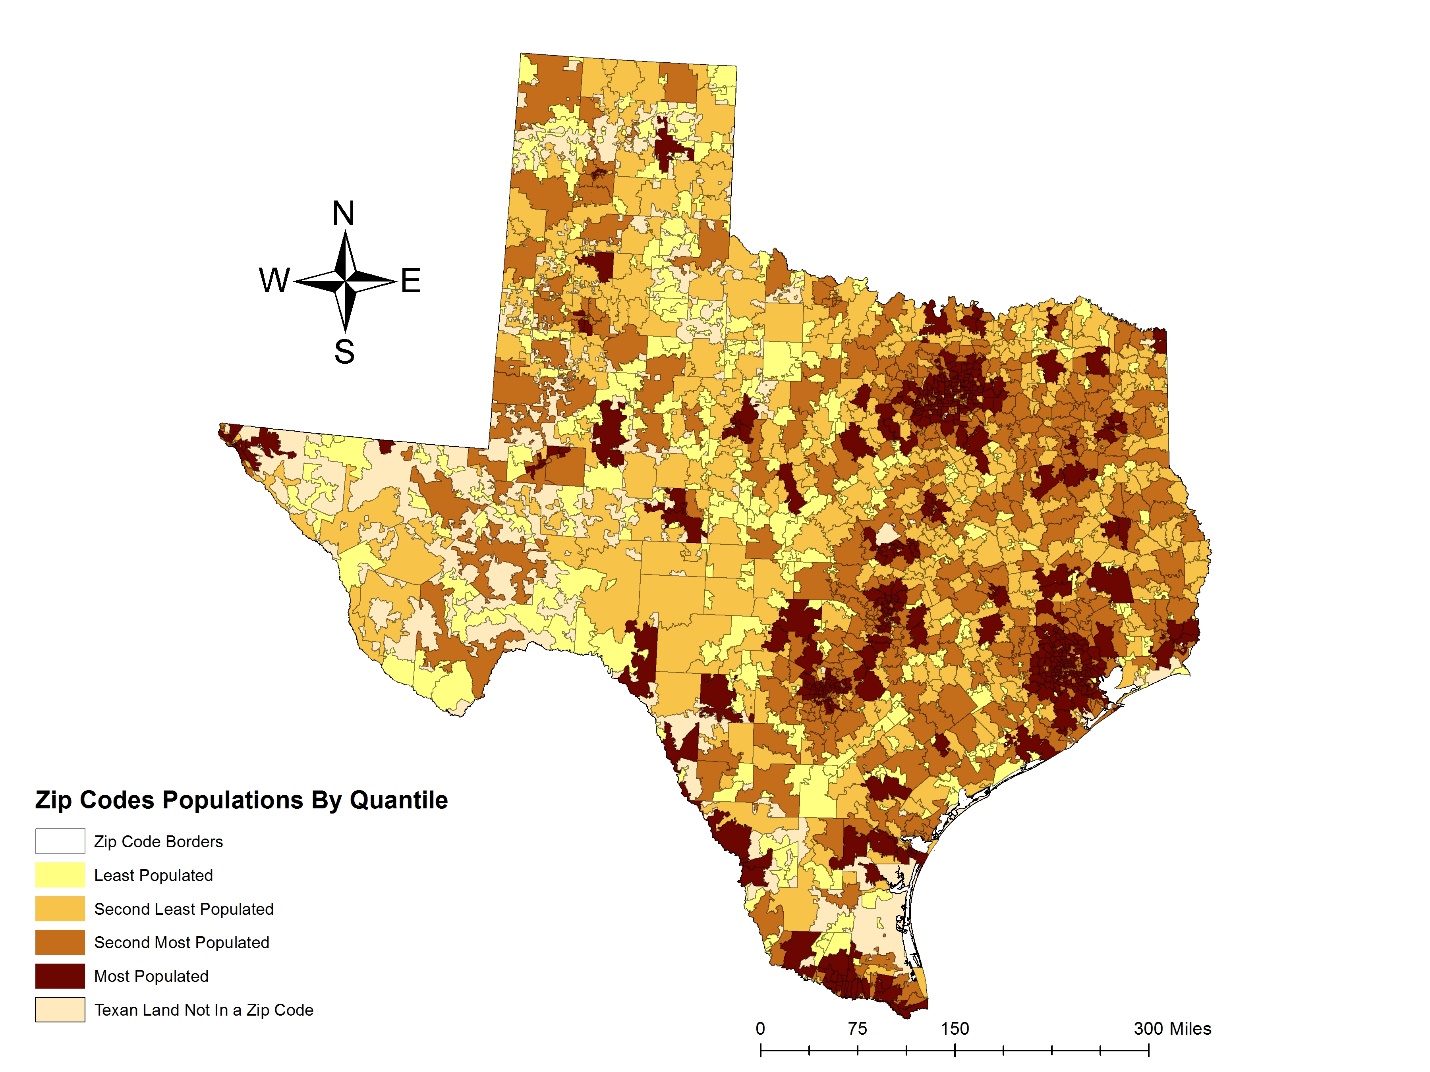 |
| Source: United States Census Bureau Tiger/Line Files, American Fact Finder (Texas Zip Code Population 2013) |

| Appendix Figure 3: Map of Survey Respondents by Texas Zip Codes |
| --- |
| 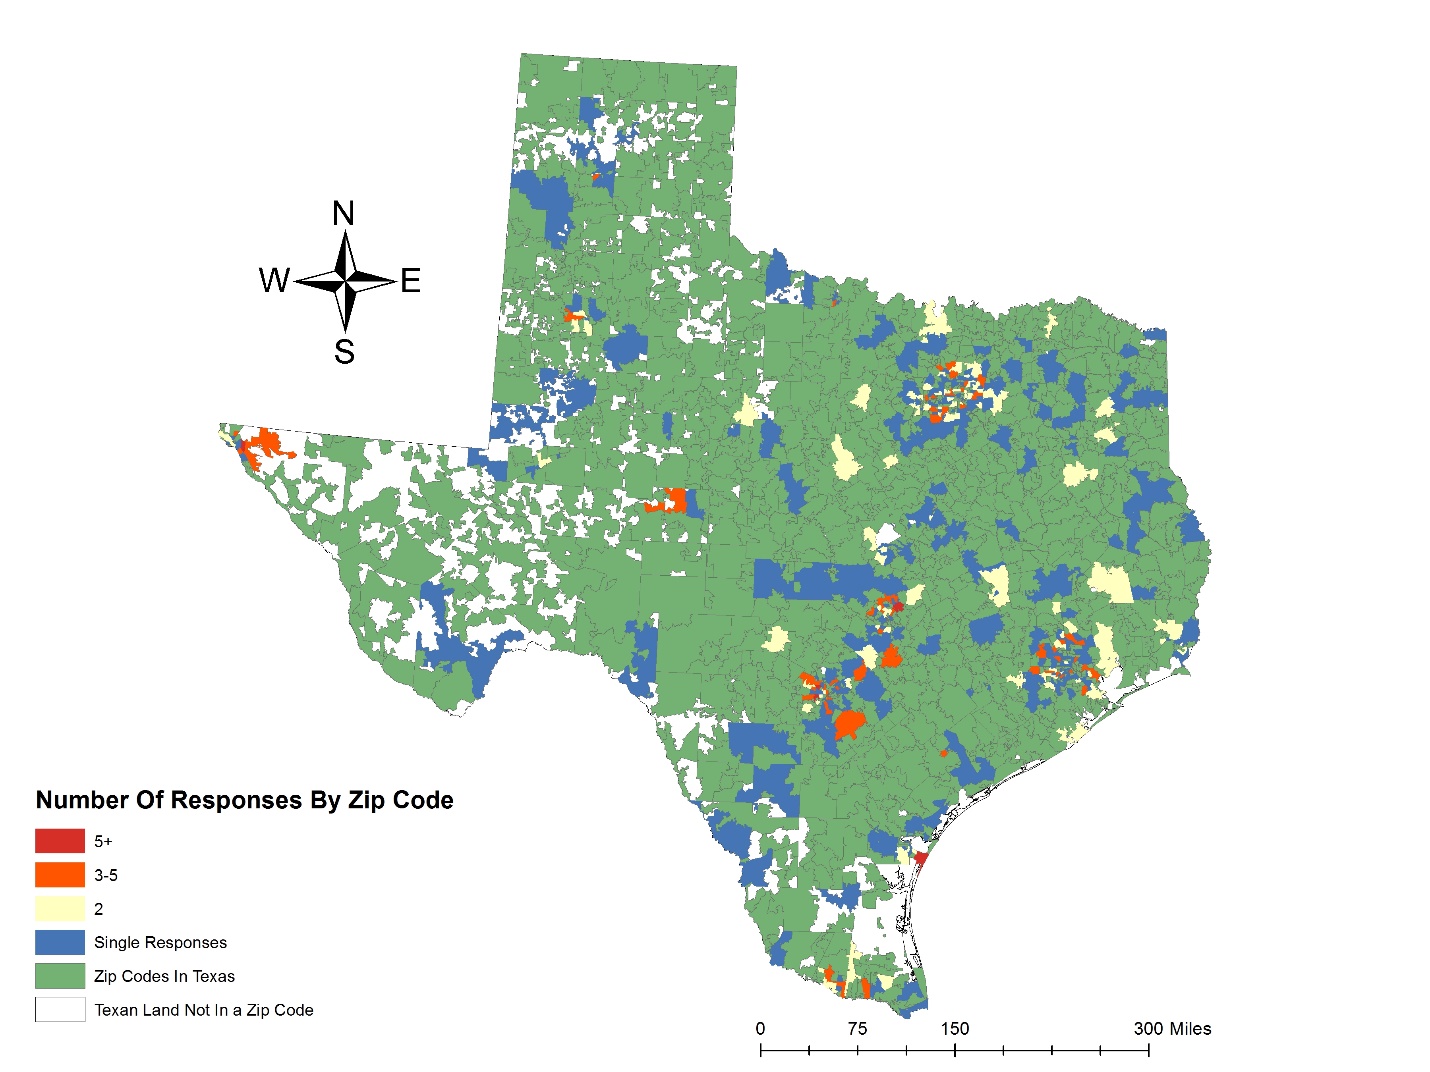 |
| Source: United States Census Bureau Tiger/Line Files |

| Appendix Figure 4: Map of Rivers and Streams in Texas |
| --- |
| 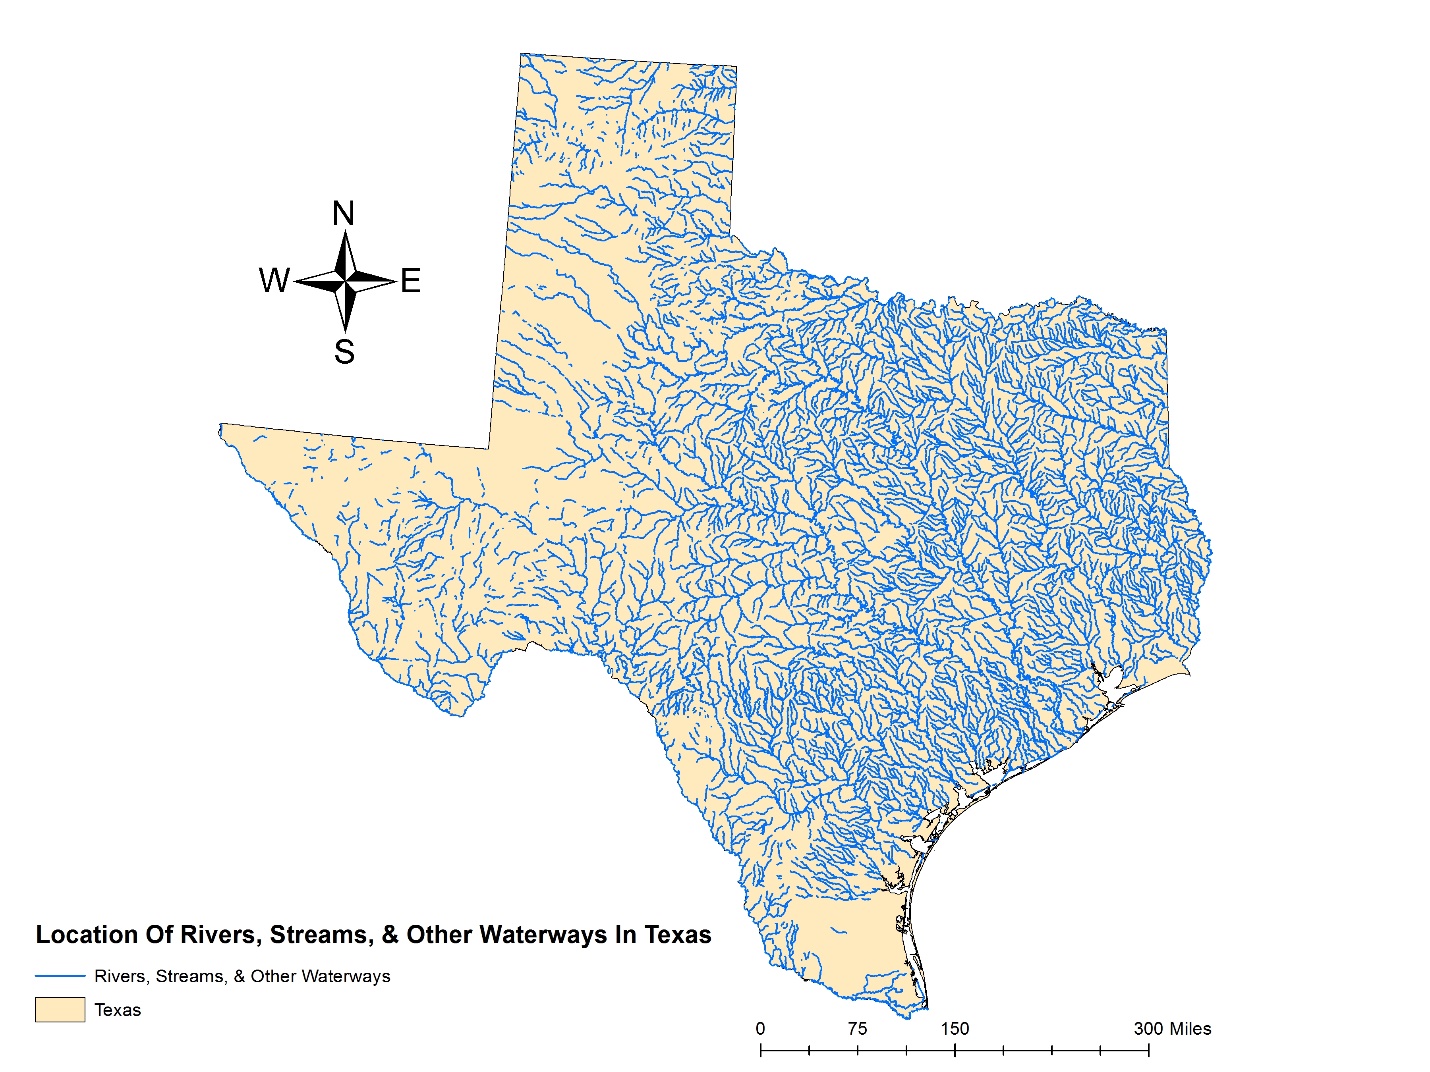 |
| Source: United States Census Bureau Tiger/Line Files, United States Geological Survey "The National Map" |

| Appendix Figure 5: Map of Texas Waterbodies |
| --- |
| 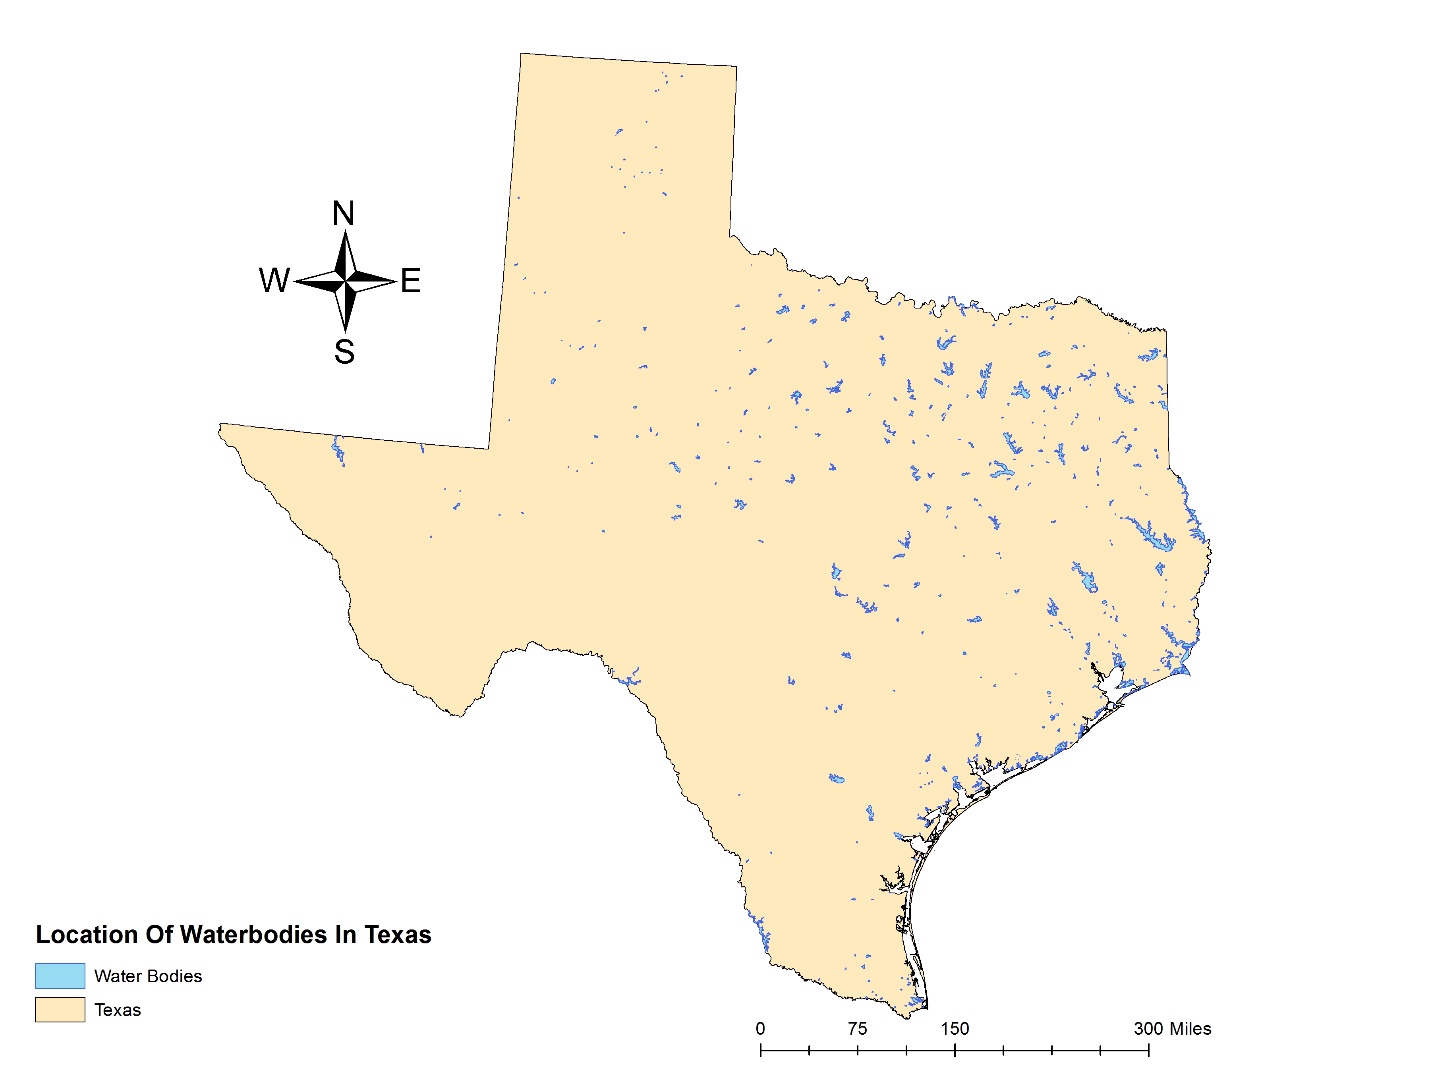 |
| Source: United States Census Bureau Tiger/Line Files, United States Geological Survey "The National Map" |

APPENDIX B

| Appendix Table 1: Variable Definitions | | |
| --- | --- | --- |
| Variable | | Operation |
| Independent Variables | | |
|  | Water Bodies | The geographical distance in meters from the center point of a respondent’s zip code to the nearest body of water (lakes, reservoirs, etc.). |
|  | Rivers and Streams | The geographical distance in meters from the center point of a respondent’s zip code to the nearest river or stream. |
|  | Concern for Water | Measured using an 11-point scale. Respondents were asked to indicate how concerned they considered themselves to be on the issue of water quality and availability, with 10 = extremely concerned, and 0 = not at all concerned. |
|  | Environmental Group | Measured nominally as 1 = yes, and 0 = no. Respondents were asked, “Are you a member of an environmental interest group?” |
|  | Drought Experience | Measured as the number of years since the respondent experienced a drought. Respondents were asked, “When did you last experience a drought or water shortage in your community?” The answer choices were: 1) “Never experienced a drought or water shortage;” 2) “Within the past 12 months;” 3) “1 to less than 2 years ago;” 4) “2–5 years ago;” 5) “6–9 years ago;” and 6) “10 years or more ago.” The answer choices were recoded such that 1 = the age of the respondent, 2 = .5, 3 = 1.5, 4 = 3.5, 5 = 7.5, and 6 = 10. |
| Demographic Variables | | |
|  | Female | Measured nominally as 1 = female, and 0 = male. |
|  | Income | Measured as the estimated annual household income (19 ordered categories representing $5,000 increments through $100,000, and $25,000 increments after that) |
|  | Married | Measured nominally as 1 = married, and 0 = not married |
|  | Ideology | Measured as a 7-point scale, with 0 = strongly liberal, and 6 = strongly conservative |
|  | White | Measured nominally as 1 = white, and 0 = all others |
|  | Rural | Measured normally as 1 = lives in rural area, and 0 = all others |
|  | Education | Measured in years of education. |
